# Supplementary material for: HES1 and HES4 have non-redundant roles downstream of Notch during early human T-cell development
Source: PubMed Central journal article supplement — Haematologica. 2020 Jan 9;106(1):130–41. doi: 10.3324/haematol.2019.226126 (PMC7776241; doi:10.3324/haematol.2019.226126), 2020-01-09
Supplement: 2019_226126-Disclosures_Contributions.pdf [file 2019_226126-Disclosures_Contributions.pdf]

Haematologica  
HAEMATOL/2019/226126  
Version 3

HES1 and HES4 have non-redundant roles downstream of Notch during early human T cell development.

Matthias De Decker, Marieke Lavaert, Juliette Roels, Laurentijn Tilleman, Bart Vandekerckhove, Georges Leclercq, Filip Van Nieuwerburgh, Pieter Van Vlierberghe, and Tom Taghon

Disclosures: This work was supported by the following funding agencies: Fund for Scientific Research Flanders (FWO), the Ghent University Special Research Fund (BOF), Stand up to Cancer (the Flemish Cancer Society), the Belgian Foundation Against Cancer (STK) and the Interuniversity Attraction Poles Program (IUAP) from the Belgian Science Policy.

Contributions: MDD performed experiments; MDD, ML, JR and LT analyzed data; BV, GL and PVV provided critical reagents; FVN performed RNA sequencing experiments; MDD and TT designed research and wrote the paper.
